# Supplementary material for: Conformational and glycan heterogeneity associated with furin cleavage of Spike as a cause of incomplete neutralization of SARS-CoV-2
Source: Research Square preprint supplement (doi:10.21203/rs.3.rs-6134096/v1), 2025-03-10
Supplement: Supplementary file 1 [file dd729a21ecbee8f39f49991d.pdf]

Figure S1

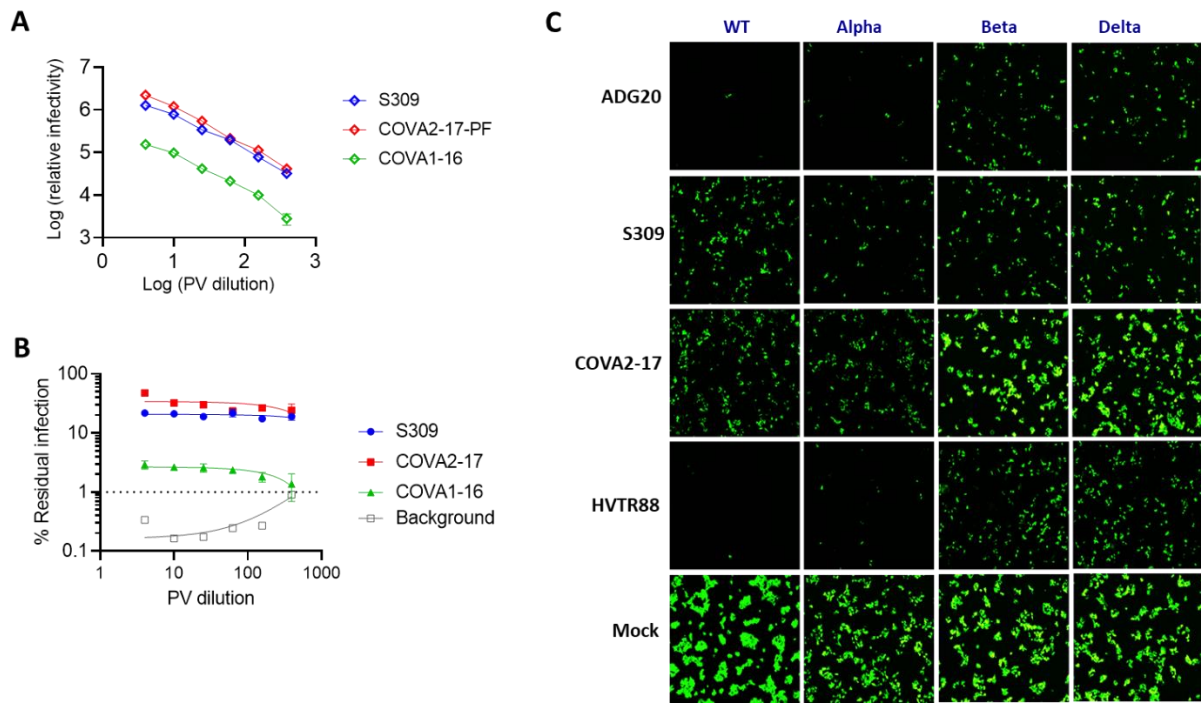

Figure S2

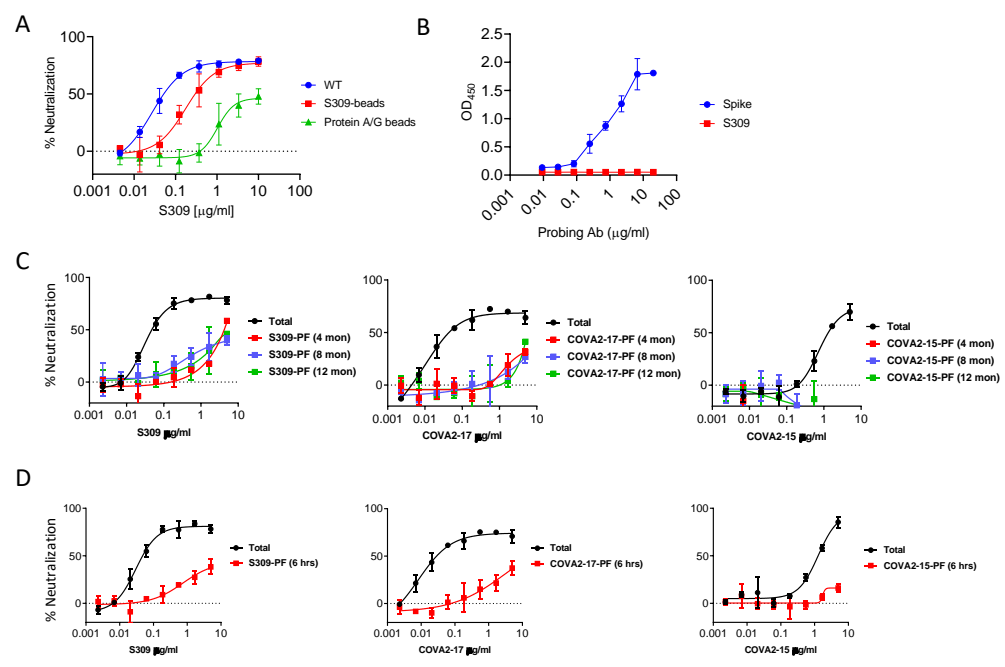

Figure S3

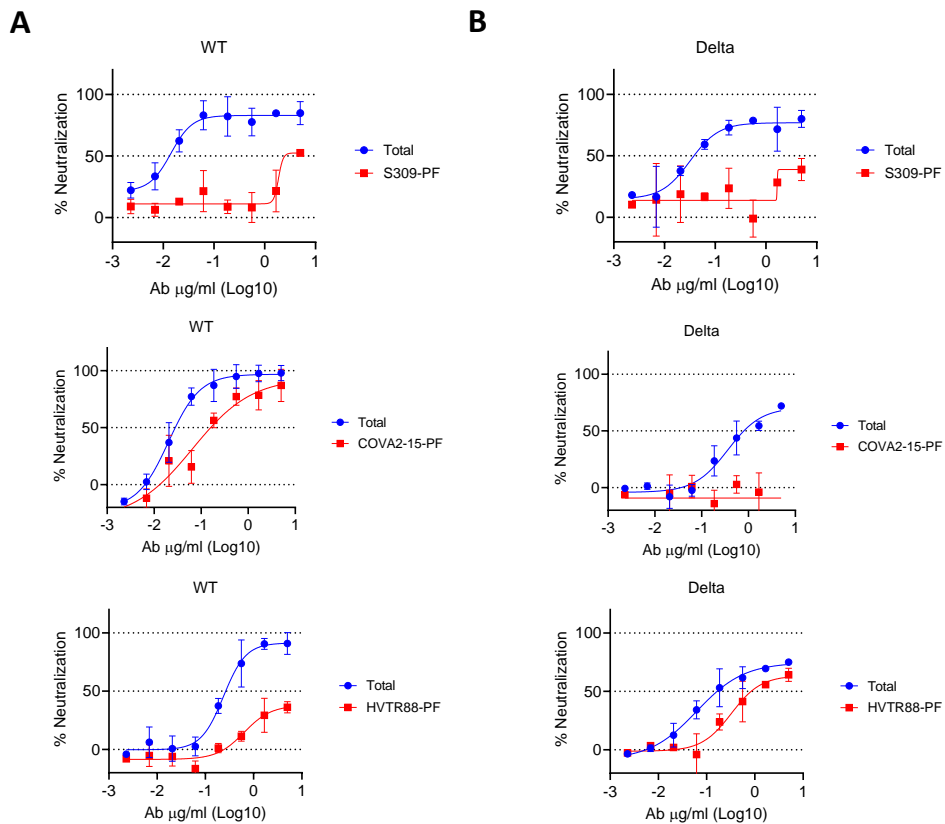

Figure S4

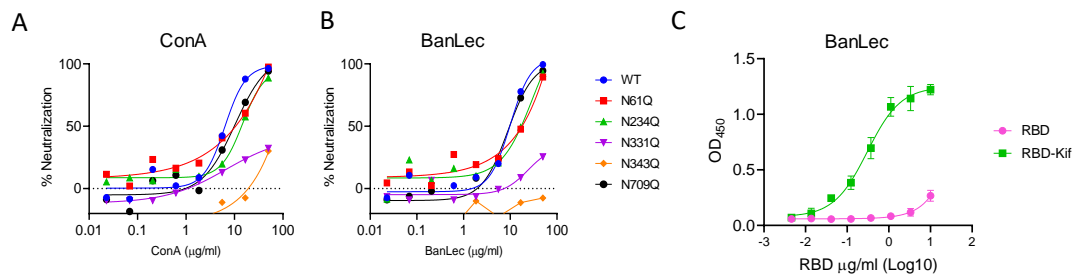

Figure S5

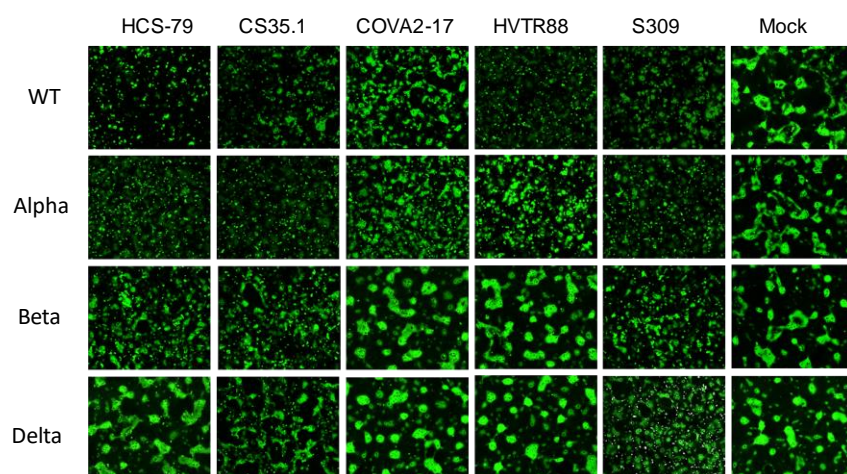

**Figure S1: The PF in neutralization of SARS-CoV-2 variant pseudoviruses.** A. Relative residual infectivity of WT in the presence of excess concentration of indicated nAbs (50  $\mu\text{g/ml}$ ) is plotted as a function of  $\log_{10}$  of varying virus inoculum. These nAbs were chosen because of their atypical neutralization that saturates below 100%. B. Percent neutralization of WT at varying inoculums by indicated nAbs is plotted. C. The residual infection of various eGFP expressing pseudovirus in the presence of indicated nAbs.

**Figure S2: The virus depletion and assessment of depleted pseudovirus:** A. Neutralization sensitivity of undepleted and depleted (PF) virus to S309. The depletion was either done by using covalently coupled S309 beads or soluble S309 followed by capture of neutralized virions by protein A/G beads (related to figure 2). B. Detection of the presence of residual S309 in the PF. The OD at 450nm is plotted from ELISA detecting viral spike probed with anti-spike mouse serum IgG and S309 was probed directly with anti-human-HRP conjugate. C. Neutralization sensitivity of undepleted and depleted WT after storage at  $-80^{\circ}\text{C}$  for months. The sensitivity of various PFs to the depleting antibodies is shown. D. Neutralization sensitivity of undepleted WT and its PF after incubating the virus at  $37^{\circ}\text{C}$  for up to 6 hours.

**Figure S3: The depletion of Ab-sensitive authentic virus from the total population to isolate PF:** A. The authentic WT virus was prepared in Vero-TMPRSS2 cells and virus sock of passage-2 was used for the depletion experiment. The depletion was done by S309, COVA2-15 or HVTR88 and was tested against the same antibodies after depletion. Shown are the neutralization patterns of the total population and respective PFs against the depleting antibodies. B. The same data as in A but for Delta virus. This virus was also prepared in the Vero-TMPRSS2 cells and passage-3 was used for the depletion.

**Figure S4: Spike fusogenicity in the presence of nAbs:** The fusion of spike-expressing cells with Vero-TMPRSS2 cells is shown in the presence of excess concentration (100µg/ml) of monoclonal antibody or 1:10 dilution of human serum HCS-79 (first wave) or CS35.1 (third wave). The fusion was recorded after 1 hour incubation of spike-transfected cells with Vero cells. Mock represents the control in which neutralizing antibody was not added.

**Figure S5: Neutralization sensitivity of pseudovirus to lectins and depletion of Spike ectodomain by ConA:** A, B. The neutralization sensitivity of WT and its glycan knock-out mutants to ConA (A) and BanLec (B). C. Binding of RBD-Kif and RBD protein to BanLec in ELISA. The RBD-Kif was expressed in the expi293 cells in the presence of Kifunensine and RBD without Kifunensine; the former is supposed to contain mannosidic glycans at N331 and N343 residues.
